# Supplementary material
Source: Research Square preprint supplement (doi:10.21203/rs.3.rs-10280475/v1)
Supplement: Supplementary file 1 [file 75cb9e9b5b1161f0281decb2.docx]

**Supplementary Table 1. The primers designed on NCBI and PRIMER PREMIER5 software.**

**>EccDNA0001 chr1:46491777–46492137**

ACTGCATAGTGGAGGGCTCTGCCTGTGGCCCATATATGACATAGGGTAGGAACTTAGCCTCTTGATGTTTGTTCCTTCTTGGACTTTTCCTCTGCCTCTCCCCCTCCACTGAGGTCTTGCGGGCCTCCAGCAACTCCACAGGACAGAGAGGATGCTCTCTGGGTCCAGGGACACTGAGGTGTTCCATTTCTACCTGAAAGATGAGGATTCTGAGGTTTAGAGAGAGCAGCCAGAATGGTGAACAGGCACCGTGCTCCTTCAGAAATCCTTGCAAGACACTTGGGGTTATAAGAAGGGTCATGGTTGACTTTATCGACTGTGTTCTCGTGGAGAATACTCGTTCTTGTATAATAATGTAGCT

**Primer pair 1**

|  | **Sequence (5'->3')** | **Template strand** | **Length** | **Tm℃** | **GC%** |
| --- | --- | --- | --- | --- | --- |
| **Forward primer** | AGCTGAGAGGGATAACCCAGGA | Plus | 22 | ~61 | 59 |
| **Reverse primer** | CAGCAGTTTAGCTACACTACCAG | Minus | 23 | ~60 | 52 |
| **Product length** | 920 |

**>EccDNA0002** **chr10:109221744-109224241**

CCAGGGACAGTACCAGGCCCCGGCAACCAGAGGACCCTGACTGAGGCCTGCCCATCTCAGCACACTGATGTGGAGAGTGAGAAGTAAGATCATCCCCCTGCATCAGTGCGAGATGAGTACATAGTCACCAGCTCCTTCTCTATCCAGCCGCCCTGGCGCTCCATGGAGACCCCTATCACCTTCATTTCTTGTCCACCTGCAGAGTGACCGCAAAGAGGCTGAAAGAGTGGCCCAAGACCGCACAGCAAAGAGGCCGCTGGGCCAAGTCGGCCAAGAAATCCTCCATGATCATCTCCATCCTGGATGCTGGGGAGCAAAGAGTCAGATTTTACAGGGGGCCTTTCTGGGTGCCTGTCTGGCCGGCACATGACACTCCACGACTAAGTGTGGTTGTGGCACGGAAGGTGCAGCTTAAATTGACTTCAAATTCATGCATCAACCCTGTAATTCTTGAAGATTGGGCATAGCCACAAGGGCTTGCTCTGGGGACTGTCAGGGGAGCACTGGGGAGCCCATAGACACGCTCGTCAACCATTGTGAACATGAGACATTCCATTGAGTTCTGGTGGATCCAACATGCTGAAGCTCACACAGACCAACTCTCCATACTATGAGAGCAAAAAAAAAAAACCACTCCGCCTCCGTGGGTGCAGAAGCCTCAGGCACCAGTTGTGTCCACACCTCCTCACCCCAAAAAAATAGCTCACCAGAGTGGACTGTCAGGATAGTAGGGACACAATGTCCACAGGCGTACAGCTCTCAAGAGAAGTCCTCTTGCCTACGACACTTTCCCCCCTTAGATCATTAAACCAGCACACTGTAAATACACTGATCGATGGGGTCGGGGATTTAGCTCAGCGGTAGAGCGCTTGCCTAGCATGCACAAGGCCCTGGGTTCGGTCCCCAGCTCCGGAAAAAAAAAAAAAGAAAAAAAAATACACTGATCGACTGCGGGGGGGGGGGTGGGGGGGAGCAAGAGCTGCAGGGCCCTGCTGTTTCTCTGATGTGGGGGAAGGGTGCTTCTGTCCTGGATACCCTGGAGGAGTGAGGGGTGATAGGCCACCAGAGCAGGTCTGGGCCCAGCAGAGGCAGGGGGGAGGGTGCATAGATTCCTCCCTACTGTGGTCACCCTAGGCCCCACCCCTACCCCAAAAGTTCCAAGGCCACCTGTCTGTAGTCCAGAGTAGCTGCCTACTGGAAGAACCAAGGGCTGGGTGAGGCTTGCCATGGGGACATCTGAGACCATGATGCTGCCCTTGGATGTCTGTCCCTAAAGGAAGTCTGGGCCTTGGACTATTTCTTAATGCCACTTCCACTCCTGCCCTGGGTTTAGGGGGTCACTGACACAGCTGCTACATTCTGCACCTTTGGTTTTATGGTGAAATGGTGACCTCCAAGTCCCTTGACCACTTAGGAAGTCATTTCTGAGCAAAGGACACTTACAGCCCTATGCCAGGTAGACAGTTCCACCAGCTCCCCTCCCTGGGAGCAAATGCCTTCAGATCTAGCCGCCCAGGGGGATTCTGTGCATCACTGAACATTCTGGCCCCACTCCAGGAGGGAGACCCAGGAGAGTCATCGTATGTGAGCTGGGCTTTGTTTGGGCTGTGCAGCCCAAGCTGAAGCTCCAGGGATATGTGGGTGGGACTCCAGGCTCCTCCTGGTCACAGGTTCATTTCCCTCCCTCCCAGGCCAAGCAAACAGAATCAGGATTAGAAACGGCCGCCCTGGCCCCCTCTGCCCACCACAGCTGCCCACCCTGGCCAGGCAGTCATGGTAAACACATTACCAGCGTCTACTAGCCAGGTGGAGCAAGGTGCCCAACCCCAGGTCCAGTGCAGTTGGTCAGCATCAACTCTCTAGAGTGGGATCTCAGGTGGGCTCATGCTAGGGTCGTCATCGGTCCCCACACCCACCACAAGCTGCCAGGGAGAGGGACACTCTGACTGGACAGGGCTTGCAGAAAACAGCACCAGGTTTAGGAAGGGGCCTTCCACACCAAAACATGGATCAGCAAATTCCCACAACAGGCCTGGGCCCCTGCCCTGCCTTACAGAACACCCCTCACCTCCCCAAGGCCCTGAGTCCTGGCAACCTCTCTCCGGGACACCTGGGGCCAACGCAGGCCCTCTTGTCCCAGTTACCTGTGCCAGGGAGGCATCCAAAGAGACAGGGGCTGATGCTGCCAGCCAGAGCTGAAGGGGCCGGCTGTGCAGGGTCTGGCCCCAAGGCCTGCCCACCTCCGGAGACCTGTAGTGGGTCCTCGCCGGTCCCTGTTCTTCTGCGGGGACTCAGGGTGGAGAAAGGGTTAATTTCCAGGCAAAATGGGAAACCGTGGCTCCAGCAGCATCATGTCGGCGGCGGTGGGGAGACAGGTGGGGGGGCAGTCGCAGCCGCAAGGCCGCCTCCGAGGGCGCCGCGCGGACTCACCCGGGTCGAAGTGGGAGCTGAAGGCAAAGCTGGGGTTGAAGAAGGACGACGACATGGCCAGGGCCAG

**Primer pair 1**

|  | **Sequence (5'->3')** | **Template strand** | **Length** | **Tm℃** | **GC%** |
| --- | --- | --- | --- | --- | --- |
| **Forward primer** | CAGACTCAGTGTTGCACACCAC | Plus | 22 | ~62 | 55 |
| **Reverse primer** | CTGGGACAAAGCAAAGGGAGGG | Minus | 22 | ~63 | 59 |
| **Product length** | 1280 |

**>EccDNA0003 chr1:45817099-45817262**

CACACACCTGCATACACACATACCTGCGCACAGGCACTCACACGCGTGCGTGCGAACACACACACAGACCTACATACACACACACACCTGCACACACAGAGACCTGCATACACATACACACCTGCACACACACAGACCTGCATACACGTATACACCTACACACA

**Primer pair 1**

|  | **Sequence (5'->3')** | **Template strand** | **Length** | **Tm℃** | **GC%** |
| --- | --- | --- | --- | --- | --- |
| **Forward primer** | CCTGAGACTCACCTGACAGCCA | Plus | 22 | ~61 | 59 |
| **Reverse primer** | GAGCTAACCGGAAACATTGCC | Minus | 21 | ~60 | 52 |
| **Product length** | 800 |

**>EccDNA0004 chr13:108712465-108712827**

GCCCAAGTTGGCTTGCTCTGCTCTCTGCACCTGACTCCCTGCTCTAGGCTGGAGAGTGGGAAGTGTCTTCAAAGTGGTAGCGGGAACAATGGCTGGGCCCTAATGGCAGCATTCTGAACCACACATCACACAAGAAACGACTGAGCTCTCCCTGTACCCACCCCTCCCACTCCAGTTCCCAAGGGCTTGAGGTTTCTCATAGTAAGGGTGTCTGATGTGGCTTCAGGAGCCTTCTTTCCTACTCTCCGTACACTGAGAAGCATGGAGGCTGTGTGGGCACCCCCTAGGCCAGCGAAAAGCGAGTACAAATACAGACTTCAAGACGAAGATTCATCTTGGGTGTTGGAGCCACTGGCAGGGATG

**Primer pair 1**

|  | **Sequence (5'->3')** | **Template strand** | **Length** | **Tm℃** | **GC%** |
| --- | --- | --- | --- | --- | --- |
| **Forward primer** | GACAGGCTGACCCATGGACAGC | Plus | 22 | ~61 | 59 |
| **Reverse primer** | CAGTGCTCAGAGTGGTAGATTC | Minus | 22 | ~60 | 50 |
| **Product length** | 600 |
